# Supplementary material for: Rapid detection of apoptosis in mammalian cells by using intact cell MALDI mass spectrometry
Source: Royal Society of Chemistry journal article supplement (doi:10.1039/c1an15750g), 2011-01-01
Supplement: c1an15750g.pdf [file c1an15750g.pdf]

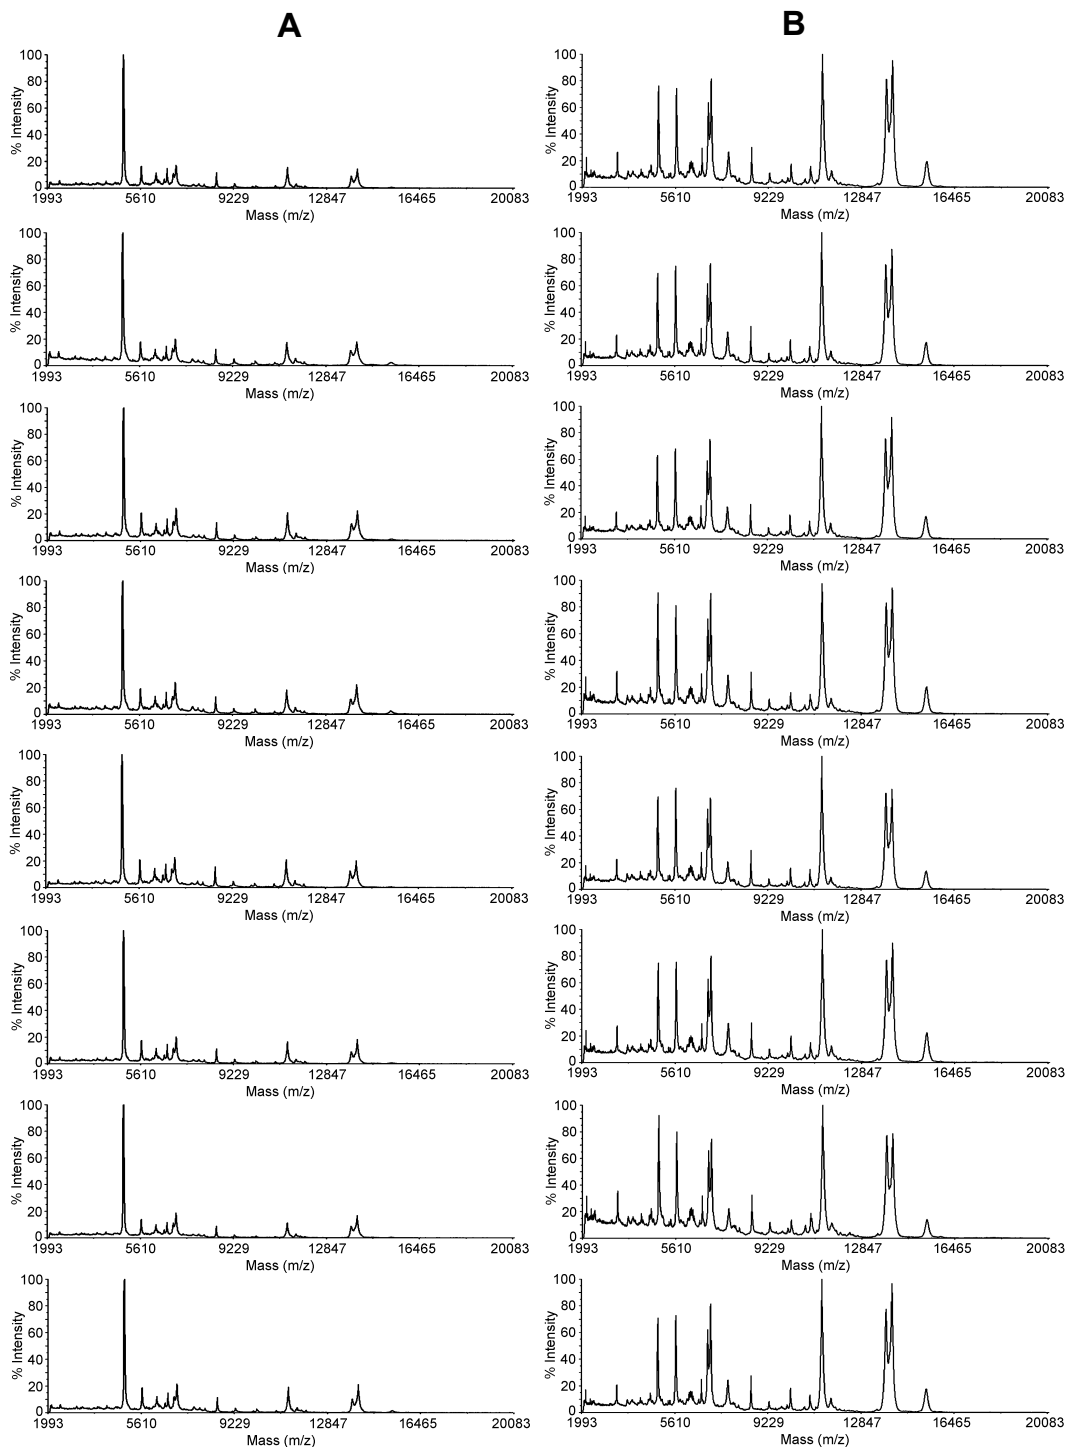

**Supplementary Fig. S1** Reproducibility of MALDI mass spectrometric analysis. (A) Eight replicated MALDI mass spectra obtained from viable HeLa cells, (B) Eight replicated MALDI mass spectra obtained from apoptotic HeLa cells.
